# Supplementary material
Source: publisher figshare collection journal article supplement (https://tandf.figshare.com/articles/dataset/_/11543910)

## Supplementary material.

Fig. S1– Phylogenetic tree of the dataset of the whole 18S region molecular marker using maximum likelihood with bootstrap statistics ( $> 75$ ) for ML (LB) and MrBayes with ( $> 0.90$ ) posterior probabilities (BI). The core group is in bold black characters, the other Gomphonematacea are in black and the representatives of the outgroup are in grey.

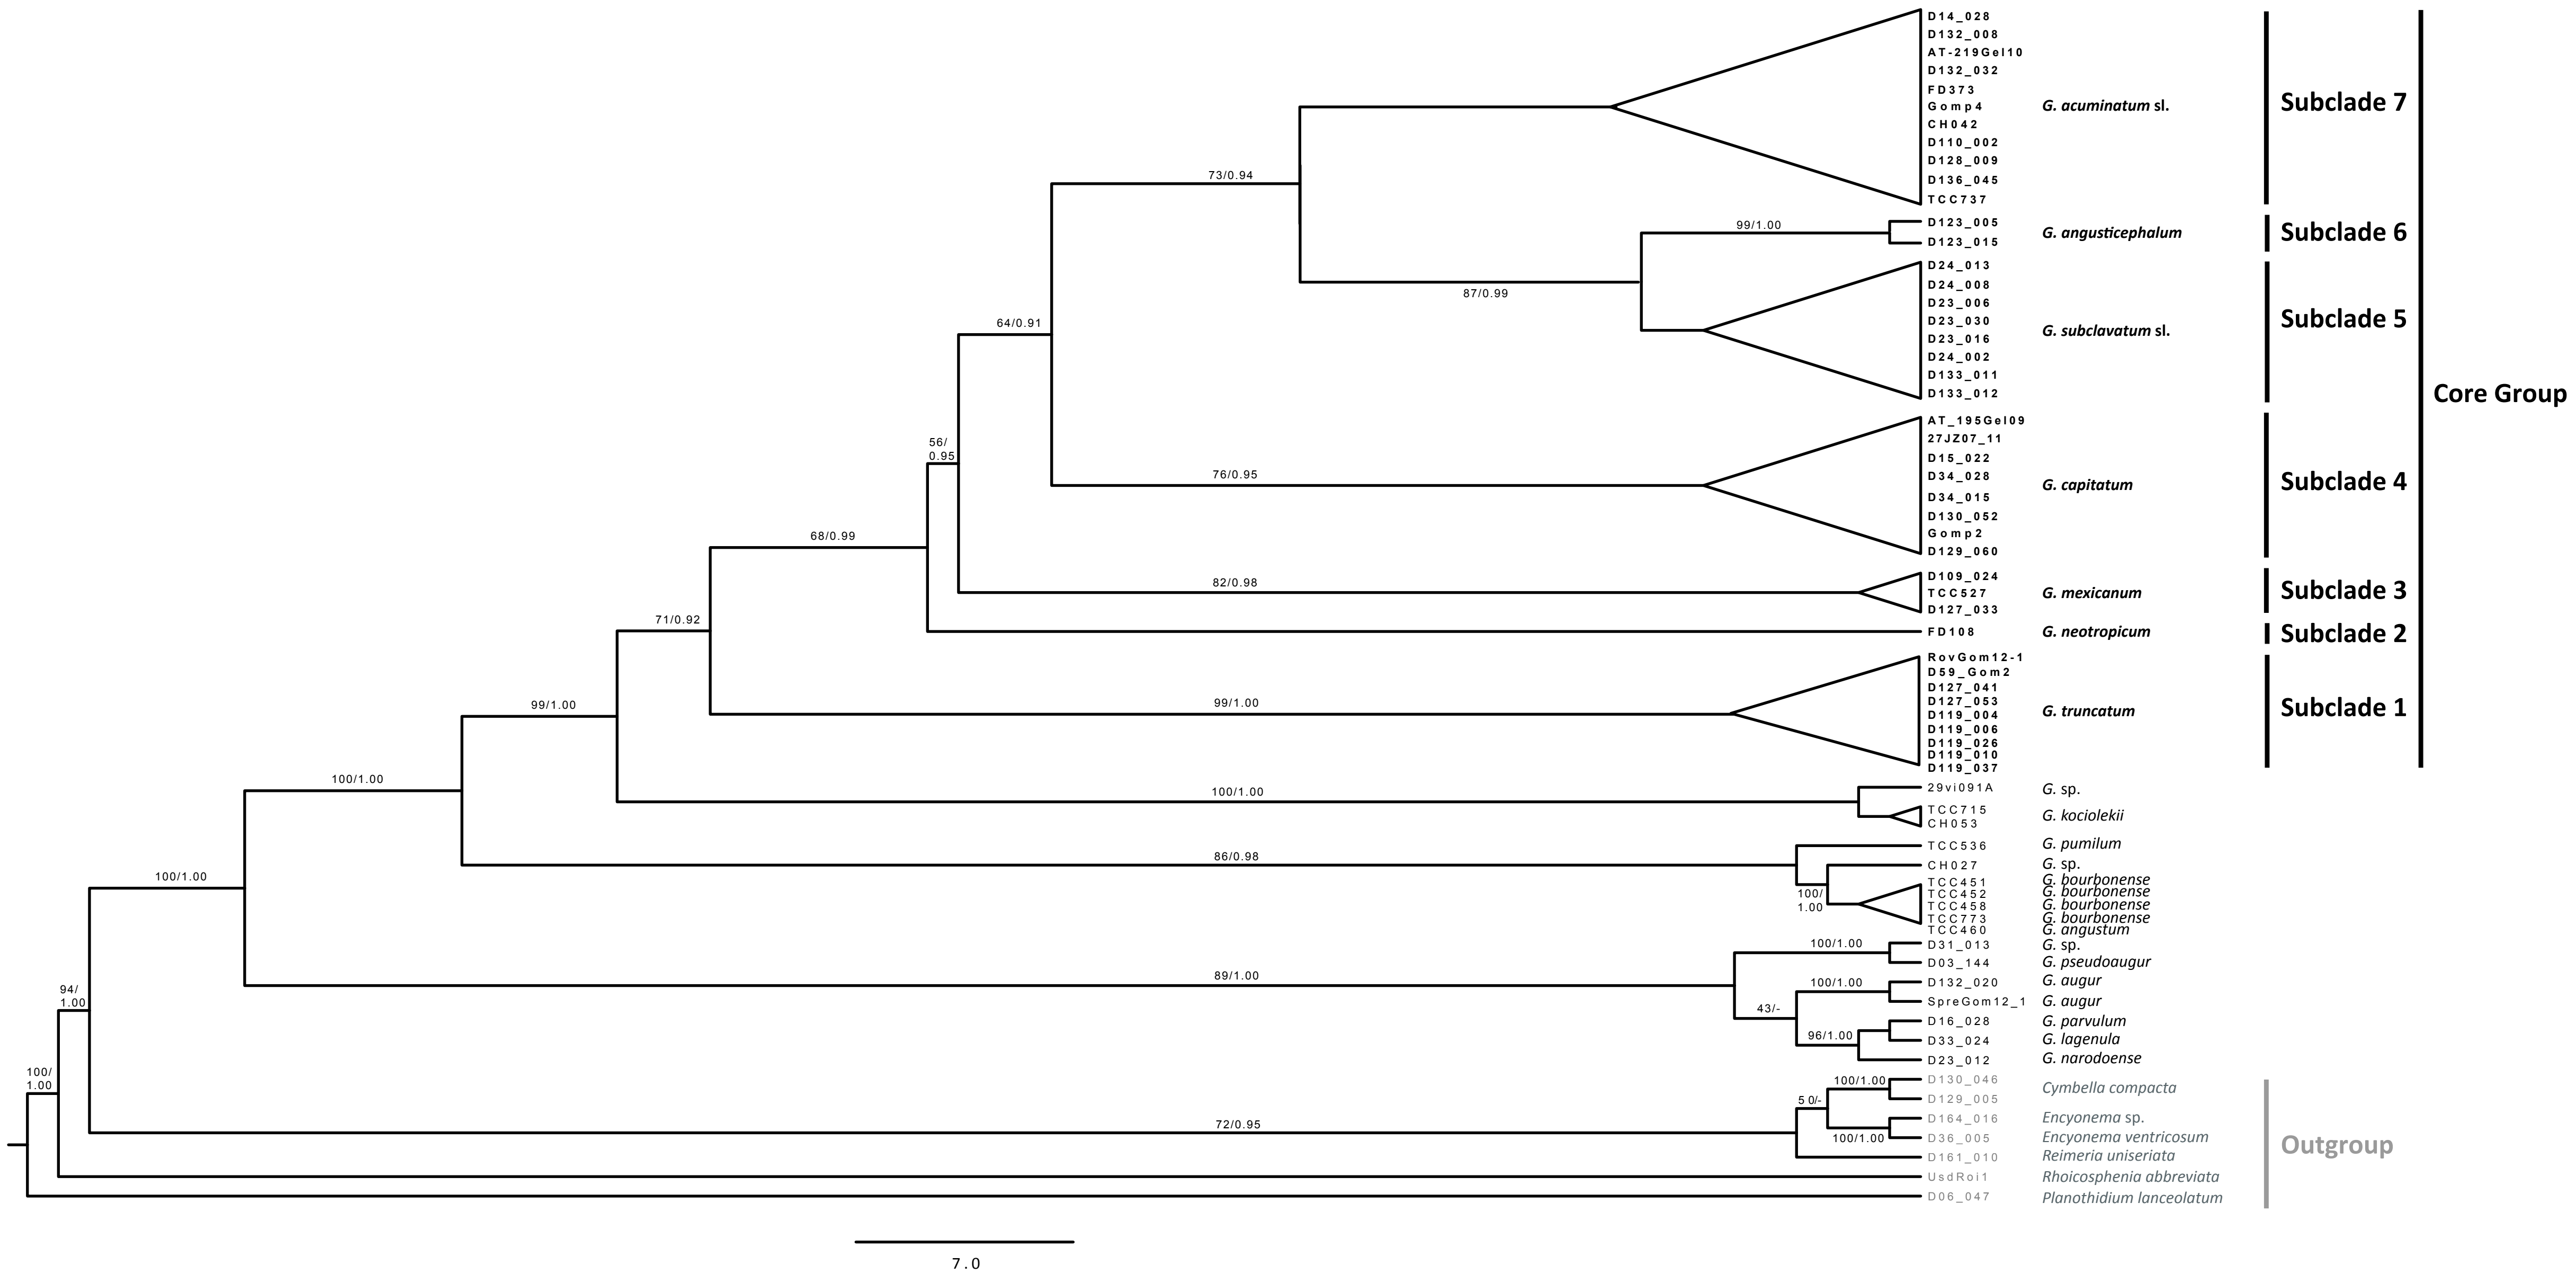

Supplement: Supplementary file 1 [file 1]
